# Supplementary material
Source: publisher figshare collection journal article supplement (https://gsapubs.figshare.com/ndownloader/files/22515410)
Supplement: Supplementary file 1 [file 22515410]

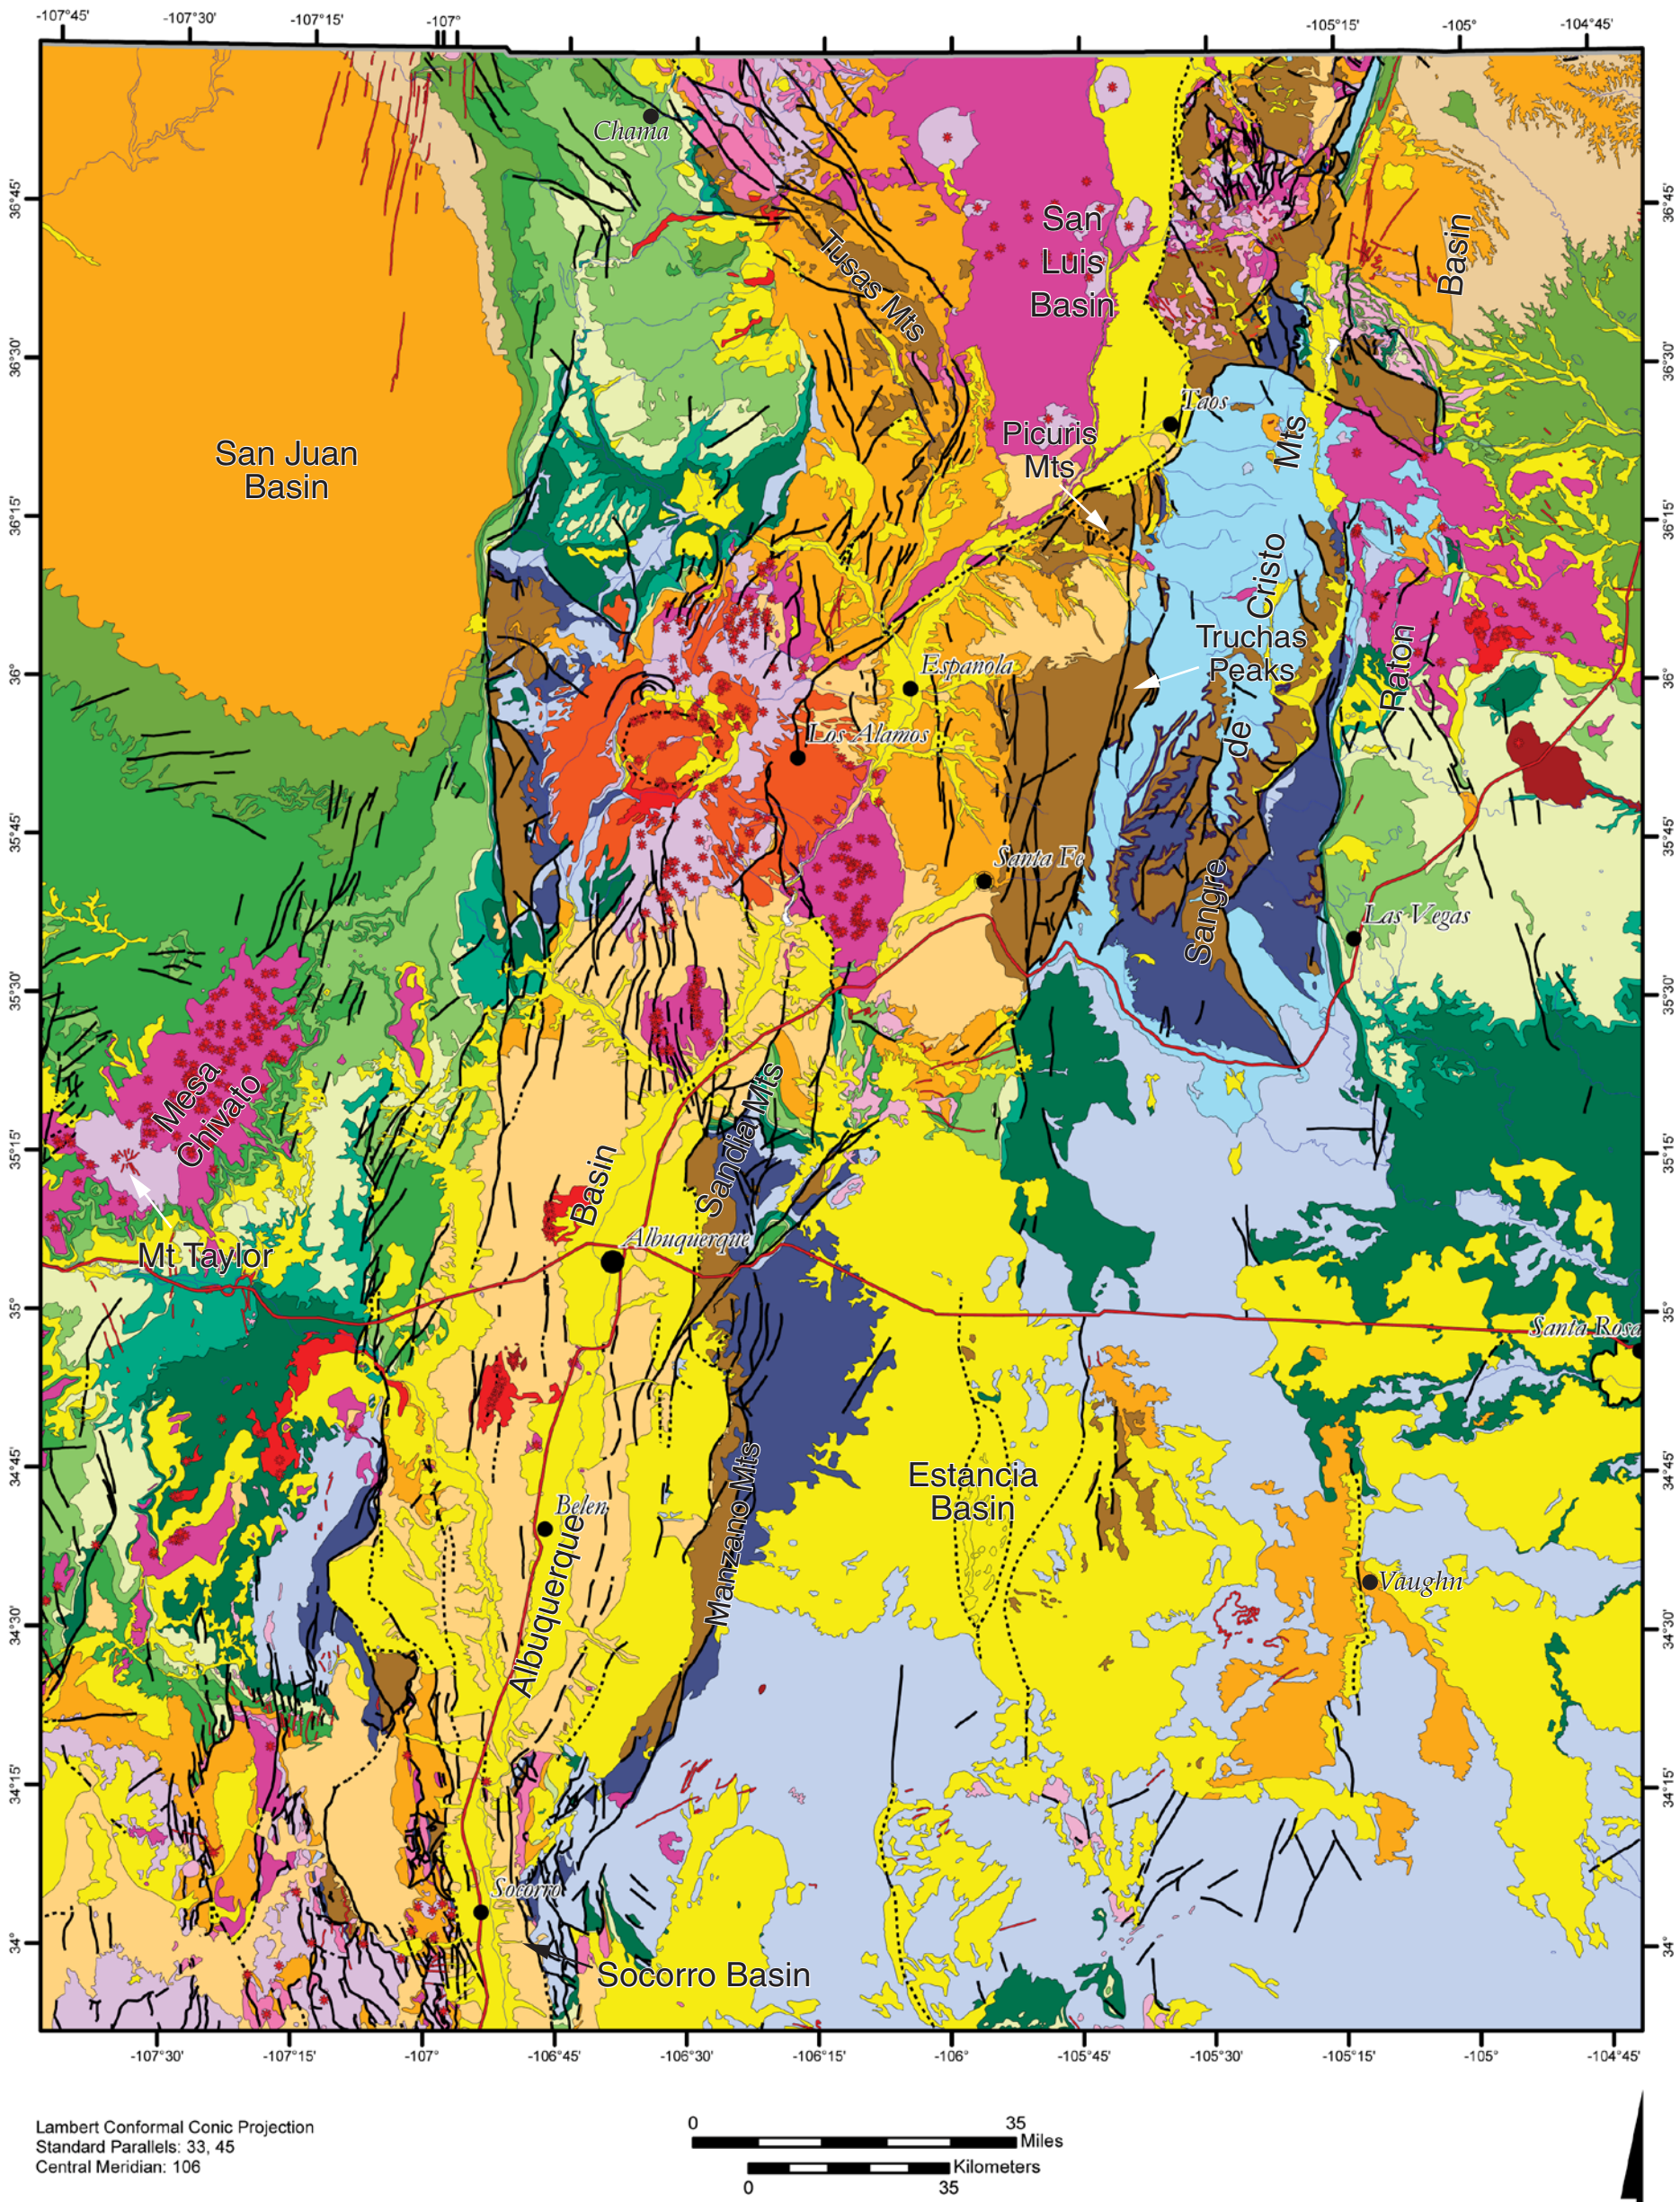

- |                                          |                                        |                                         |
|------------------------------------------|----------------------------------------|-----------------------------------------|
| Quaternary sediments                     | Tertiary intrusive rocks               | Cretaceous intrusive rocks              |
| Quaternary basaltic volcanic rocks       | Cretaceous-Tertiary sedimentary rocks  | Jurassic sedimentary rocks              |
| Quaternary silicic volcanic rocks        | Cretaceous-Tertiary volcanic rocks     | Triassic sedimentary rocks              |
| Quaternary-Tertiary sediments            | Cretaceous rocks undivided             | Paleozoic rocks undivided               |
| Quaternary-Tertiary volcanic rocks       | Cretaceous sedimentary rocks above Kmv | Permian sedimentary rocks               |
| Tertiary sedimentary rocks               | Cretaceous Mesaverde group             | Pennsylvanian-Permian sedimentary rocks |
| Tertiary volcanic rocks undifferentiated | Cretaceous Mancos Shale                | Pennsylvanian sedimentary rocks         |
| Tertiary basaltic volcanic rocks         | Cretaceous sedimentary rocks below Km  | Mississippian to Cambrian rocks         |
| Tertiary silicic volcanic rocks          | Cretaceous volcanic rocks              | Precambrian rocks undifferentiated      |
|                                          |                                        | volcanic vents                          |

Figure 2A. Geologic map of north-central New Mexico (simplified from New Mexico Bureau of Geology and Mineral Resources, 2003) showing geographic localities. Kmv—Cretaceous Mesaverde Group; Km—Cretaceous Mancos Shale.

Palinspastic reconstruction of Proterozoic basement-related aeromagnetic features in north-central New Mexico: Implications for Mesoproterozoic to late Cenozoic tectonism  
S.M. Cather, K.E. Karlstrom, J.M. Timmons, and M.T. Heizler
